# Supplementary material for: The influence of acute exercise on bone biomarkers: protocol for a systematic review with meta-analysis
Source: PubMed Central journal article supplement (PMC7733242; doi:10.1186/s13643-020-01551-y), 2020-12-12
Supplement: 13643_2020_1551_MOESM2_ESM.pdf [file 13643_2020_1551_MOESM2_ESM.pdf]

**The Influence of Acute Exercise on Bone Biomarkers: Protocol for a Systematic Review with Meta-Analysis**

**Supplementary File Two**

**Codebook**

| Column               | Heading | Description              |                                                                                                                                                                         |
|----------------------|---------|--------------------------|-------------------------------------------------------------------------------------------------------------------------------------------------------------------------|
| <b>STUDY DETAILS</b> | A       | Study Number             | Study number                                                                                                                                                            |
|                      | B       | Author                   | First author surname <i>et al.</i> ,                                                                                                                                    |
|                      | C       | Year                     | Year of publication                                                                                                                                                     |
|                      | D       | Journal                  | Journal name                                                                                                                                                            |
|                      | E       | Title                    | Study title                                                                                                                                                             |
|                      | F       | Funding/COI              | List all funding sources, and any declared conflict of interest.                                                                                                        |
|                      | G       | Aim                      | Study aim                                                                                                                                                               |
|                      | H       | Design                   | Main study design, with brief description of conditions investigated.                                                                                                   |
|                      | I       | Design Code              | Experimental Trials = 1; Observational Trials = 2                                                                                                                       |
|                      | J       | Nutritional Intervention | 1 = Studies without a nutritional intervention; 2 = Studies that include a nutritional intervention (e.g., exercise conducted with and without calcium supplementation) |
|                      | K       | Nutritional Intervention | If column H is coded 1, provide a brief description of the nutritional intervention under investigation.                                                                |
| <b>POPULATION</b>    | L       | Participant Overview     | Brief descriptive overview of the participant population (age, sex, health and training status)                                                                         |
|                      | M       | Starting n               | Number of individuals initially enrolled in the study.                                                                                                                  |
|                      | N       | End n                    | Number of individuals who finished the study.                                                                                                                           |
|                      | O       | Training Status          | Come up with coding categories.                                                                                                                                         |

|                       |                 |                    |                                                                                                                                                                                                                                                                                                                                                                                                                                                                                                                                                                                                                                                                                                                                           |
|-----------------------|-----------------|--------------------|-------------------------------------------------------------------------------------------------------------------------------------------------------------------------------------------------------------------------------------------------------------------------------------------------------------------------------------------------------------------------------------------------------------------------------------------------------------------------------------------------------------------------------------------------------------------------------------------------------------------------------------------------------------------------------------------------------------------------------------------|
|                       | P               | Sex                | 1 = male, 2 = female, 3 = mixed male and female group.                                                                                                                                                                                                                                                                                                                                                                                                                                                                                                                                                                                                                                                                                    |
|                       | Q               | Age                | Mean (yrs)                                                                                                                                                                                                                                                                                                                                                                                                                                                                                                                                                                                                                                                                                                                                |
|                       | R               | Age                | SD (yrs)                                                                                                                                                                                                                                                                                                                                                                                                                                                                                                                                                                                                                                                                                                                                  |
|                       | S               | Height             | Mean (cm)                                                                                                                                                                                                                                                                                                                                                                                                                                                                                                                                                                                                                                                                                                                                 |
|                       | T               | Height             | SD (cm)                                                                                                                                                                                                                                                                                                                                                                                                                                                                                                                                                                                                                                                                                                                                   |
|                       | U               | Weight             | Mean (kg)                                                                                                                                                                                                                                                                                                                                                                                                                                                                                                                                                                                                                                                                                                                                 |
|                       | V               | Weight             | SD (kg)                                                                                                                                                                                                                                                                                                                                                                                                                                                                                                                                                                                                                                                                                                                                   |
|                       | W               | BMI                | Mean                                                                                                                                                                                                                                                                                                                                                                                                                                                                                                                                                                                                                                                                                                                                      |
|                       | X               | BMI                | SD                                                                                                                                                                                                                                                                                                                                                                                                                                                                                                                                                                                                                                                                                                                                        |
|                       | AB              | Comments           | Any additional information relevant information related to the participants investigated.                                                                                                                                                                                                                                                                                                                                                                                                                                                                                                                                                                                                                                                 |
| EXERCISE TEST DETAILS | AC              | Exercise stimulus  | Brief narrative description of the test undertaken.                                                                                                                                                                                                                                                                                                                                                                                                                                                                                                                                                                                                                                                                                       |
|                       | AD              | Type               | 1 = resistance (defined as exercises that cause the body's muscles to work or hold against an applied force or weight, <i>e.g.</i> , weight lifting); 2 = aerobic (defined as activities whereby large muscle groups move in a rhythmic manner for a sustained period of time, <i>e.g.</i> , walking, running or cycling); 3 = multi-modal (defined as exercise bouts that comprise a combination of exercise modalities, <i>e.g.</i> , sessions that comprise a mixture of both resistance and aerobic exercises); 4 = plyometric (high-impact exercise types designed to develop muscular power, <i>e.g.</i> , jump based exercise bouts); 5 = calisthenics (systematic rhythmic body weight exercises, <i>e.g.</i> , yoga or pilates). |
|                       | AE              | Aerobic type       | 1 = running; 2 = cycling; 3 = other.                                                                                                                                                                                                                                                                                                                                                                                                                                                                                                                                                                                                                                                                                                      |
|                       | AF              | Aerobic type       | 1 = continuous; 2 = intermittent.                                                                                                                                                                                                                                                                                                                                                                                                                                                                                                                                                                                                                                                                                                         |
|                       | AG              | Intensity          | Effort related to maximum capacity, <i>e.g.</i> , % VO <sub>2</sub> max or 1RM.                                                                                                                                                                                                                                                                                                                                                                                                                                                                                                                                                                                                                                                           |
|                       | AH              | Duration           | Minutes.                                                                                                                                                                                                                                                                                                                                                                                                                                                                                                                                                                                                                                                                                                                                  |
| AI                    | Total work done | Intensity*Duration |                                                                                                                                                                                                                                                                                                                                                                                                                                                                                                                                                                                                                                                                                                                                           |

|                 |    |                      |                                                                                                                                                                                                                                                                                                                                                                                                                                                                                                                                                                                                                                                                                                                                                                                                                                |
|-----------------|----|----------------------|--------------------------------------------------------------------------------------------------------------------------------------------------------------------------------------------------------------------------------------------------------------------------------------------------------------------------------------------------------------------------------------------------------------------------------------------------------------------------------------------------------------------------------------------------------------------------------------------------------------------------------------------------------------------------------------------------------------------------------------------------------------------------------------------------------------------------------|
| <b>SAMPLING</b> | AJ | Impact level         | 1 = low-impact/repetitive; 2 = moderate-impact/repetitive; 3 = low-impact with high muscular load; 4 = high-impact/multi-directional.                                                                                                                                                                                                                                                                                                                                                                                                                                                                                                                                                                                                                                                                                          |
|                 | AK | Exercise termination | 1 = conducted to exhaustion; 2 = fixed load.                                                                                                                                                                                                                                                                                                                                                                                                                                                                                                                                                                                                                                                                                                                                                                                   |
|                 | AL | Samples              | Brief narrative description of the number and timing of samples taken.                                                                                                                                                                                                                                                                                                                                                                                                                                                                                                                                                                                                                                                                                                                                                         |
|                 | AM | Baseline condition   | Time of day                                                                                                                                                                                                                                                                                                                                                                                                                                                                                                                                                                                                                                                                                                                                                                                                                    |
|                 | AN | Baseline condition   | 1 = fed; 2 = fasted                                                                                                                                                                                                                                                                                                                                                                                                                                                                                                                                                                                                                                                                                                                                                                                                            |
|                 | AO | Bone biomarkers      | List all bone biomarkers assessed.                                                                                                                                                                                                                                                                                                                                                                                                                                                                                                                                                                                                                                                                                                                                                                                             |
|                 | AP | Other biomarkers     | List all other biomarkers assessed.                                                                                                                                                                                                                                                                                                                                                                                                                                                                                                                                                                                                                                                                                                                                                                                            |
|                 | AQ | Bone biomarker       | 1 = bone specific alkaline phosphatase (B-ALP); 2 = dickkopf-1 (DKK-1); 3 = carboxyterminal propeptide of type 1 procollagen (P1CP); 4 = N-terminal propeptide of type 1 procollagen (P1NP); 5 = sclerostin; 6 = pyridinoline (Pyr); 7 = deoxypyridinoline (Dpd); 8 = carboxyterminal telopeptide of type-1 procollagen (ICTP); 9 = aminoterminal telopeptide of type 1 collagen (NTx); 10 = cathepsin K; 11 = C-terminal telopeptide of type 1 collagen ( $\beta$ -CTX-1); 12 = tartrate resistance acid phosphatase isoenzyme 5b (TRAP5b), 13 = OPG/RANKL ratio, 14 = hydroxylysine; 15 = hydroxyproline) 16 = osteopontin; 17 = osteocalcin; 18 = calcium; 19 = phosphorus; 20 = parathyroid hormone                                                                                                                        |
|                 | AR | Subtype              | If information regarding specific biomarker subtype is provided, insert as free text.                                                                                                                                                                                                                                                                                                                                                                                                                                                                                                                                                                                                                                                                                                                                          |
|                 | AS | Process              | 1 = Formation (bone specific alkaline phosphatase (B-ALP); dickkopf-1 (DKK-1); carboxyterminal propeptide of type 1 procollagen (P1CP) and N-terminal propeptide of type 1 procollagen (P1NP) and sclerostin); 2 = Resorption (pyridinoline (Pyr); deoxypyridinoline (Dpd); carboxyterminal telopeptide of type-1 procollagen (ICTP); aminoterminal telopeptide of type 1 collagen (NTx); cathepsin K; C-terminal telopeptide of type 1 collagen ( $\beta$ -CTX-1); tartrate resistance acid phosphatase isoenzyme 5b (TRAP5b), the ratio of osteoprotegerin to receptor activator NF kappaB ligand (OPG/RANKL), hydroxylysine and hydroxyproline); 3 = General (osteopontin and total and undercarboxylated osteocalcin (T/U-OC); 4 = Ca Metabolism (ionized or albumin adjusted calcium, phosphorus and parathyroid hormone) |

|           |    |                         |                                                                                                                                                                                                                                                                                                                                                                                               |
|-----------|----|-------------------------|-----------------------------------------------------------------------------------------------------------------------------------------------------------------------------------------------------------------------------------------------------------------------------------------------------------------------------------------------------------------------------------------------|
|           | AT | Direction               | 1 = increase represents an increase in the relevant process; -1 = increase represents a decrease in the relevant process (e.g., sclerostin has an anti-formation action).                                                                                                                                                                                                                     |
|           | AU | Sample type             | 1 = serum; 2 = plasma; 3 = urine.                                                                                                                                                                                                                                                                                                                                                             |
|           | AV | Process                 | Brief narrative description of the assay used/assessment type.                                                                                                                                                                                                                                                                                                                                |
|           | AX | Inter-assay variability | %                                                                                                                                                                                                                                                                                                                                                                                             |
|           | AY | Intra-assay variability | %                                                                                                                                                                                                                                                                                                                                                                                             |
|           | AZ | Unit                    | Unit of measurement                                                                                                                                                                                                                                                                                                                                                                           |
| MAIN DATA | BA | Baseline                | Mean                                                                                                                                                                                                                                                                                                                                                                                          |
|           | BB | Baseline                | SD                                                                                                                                                                                                                                                                                                                                                                                            |
|           | BC | Time                    | Exact time at which the measurement was taken                                                                                                                                                                                                                                                                                                                                                 |
|           | BD | Time                    | 1 = sample taken immediately before the exercise bout (i.e., within 15 minutes before exercise commencement); 2 = samples taken within 15 minutes and 2 hours before exercise commencement); 3 = samples taken > 2 hours before exercise commencement)                                                                                                                                        |
|           | BE | Post Exercise           | Mean                                                                                                                                                                                                                                                                                                                                                                                          |
|           | BF | Post Exercise           | SD                                                                                                                                                                                                                                                                                                                                                                                            |
|           | BG | Time                    | Exact time at which the measurement was taken                                                                                                                                                                                                                                                                                                                                                 |
|           | BH | Time                    | 1 = sample taken immediately post exercise (i.e., within 15 minutes of exercise termination); 2 = samples taken within 15 minutes and 2 hours post exercise; 3 = samples taken within 2 and 5 hours post exercise; 4 = samples taken 1 day post exercise; 5 = samples taken 2 days post exercise; 6 = samples taken 3 days post exercise; 7 = samples taken 4 days post exercise, <i>etc.</i> |
|           | BI | During/Post             | 1 = sample taken post exercise; 2 = sample taken during the exercise bout.                                                                                                                                                                                                                                                                                                                    |

|  | BJ | Comment | Any other relevant comments |
|--|----|---------|-----------------------------|
|--|----|---------|-----------------------------|
